# Supplementary material
Source: publisher figshare collection journal article supplement (https://tandf.figshare.com/articles/dataset/_/9937802)
Supplement: Supplementary file 1 [file 1]

**Supplementary Table.** Nerve conduction studies.

| *Nerve* | *Tract* | *MCV (m/s)* | *dL (ms)* | *CMAP (mV)* |
| --- | --- | --- | --- | --- |
|  |  |  |  |  |
| **R Tibialis** | LM-AH |  |  | absent |
|  |  |  |  |  |
| **L Tibialis** | LM-AH |  | 12.2 (≤5) | 0.1 (≥5) |
|  |  |  |  |  |
| **R Deep Peroneal** | PF-FH | 46 (≥40) |  | 0.5 (≥4) |
|  | FH-TA |  | 5.3 (≤4) | 0.5 (≥4) |
|  |  |  |  |  |
| **L Deep Peroneal** | PF-FH | 61 (≥40) |  | 0.9 (≥4) |
|  | FH-TA |  | 2.6 (≤4) | 1.3 (≥4) |
|  |  |  |  |  |
| **R Median** | E-W | 41 (≥45) |  | 0.2 (≥5) |
|  | W-APB |  | 9.2 (≤3) | 0.4 (≥5) |
|  |  |  |  |  |
| **R Ulnar** | Ax-Ab. E | 61 (≥45) |  | 1.6 (≥5) |
|  | Ab. E-Bel. E | 50 (≥45) |  | 1.8 (≥5) |
|  | E-W | 55 (≥45) |  | 1.8 (≥5) |
|  | W-ADM |  | 3.0 (≤3) | 2.1 (≥5) |
|  |  |  |  |  |
| **L Musculocutaneous** | Erb–Ax | 62 (≥45) |  | 4.6 (≥ 5) |
|  | Ax-BB |  | 2.6 (≤ 4) | 5.2 (≥ 5) |
|  |  |  |  |  |
| *F wave* |  |  | *mL (ms)* |  |
|  |  |  |  |  |
| **R Ulnar** |  |  | absent |  |
|  |  |  |  |  |
| *Nerve* | *Tract* | *SCV (m/s)* |  | *SNAP (V)* |
|  |  |  |  |  |
| **R Sural** | A-SURA |  |  | absent |
| **L Sural** | A-SURA |  |  | absent |
|  |  |  |  |  |
| **R Radial** | IF-W |  |  | absent |
| **L Radial** | IF-W |  |  | absent |
|  |  |  |  |  |
| **R Median** | IF-W |  |  | absent |
| **L Median** | IF-W |  |  | absent |
|  |  |  |  |  |

*Legend*:**MCV**, motor conduction velocity; **dL**, distal latency; **CMAP**, compound muscle action potential; **R**, right; **L**, left; **LM**,lateral malleolus; **AH**,abductor hallucis; **PF**, popliteal fossa; **FH**, fibula head; **A**, ankle; **EDB**, extensor digitorum brevis; **TA**, tibialis anterior; **E**, elbow; **W**, wrist; **APB**, abductor pollicis brevis; **Ax**, axilla; **Ab. E**, above elbow; **Bel. E**, below elbow; **ADM**, abductor digiti minimi; **BB**, biceps brachii; **mL**, mean latency; **SCV**, sensory conduction velocity; **SNAP**, sensory nerve action potential; **IF**,first finger. Normal values are given in brackets.
